# Supplementary material for: An intelligent and biocompatible photosensitizer conjugated silicon quantum dots–MnO2 nanosystem for fluorescence imaging-guided efficient photodynamic therapy
Source: Royal Society of Chemistry journal article supplement (doi:10.1039/c8tb00931g), 2018-01-01
Supplement: c8tb00931g1.pdf [file c8tb00931g1.pdf]

## **Supporting information**

### **Intelligent and biocompatible photosensitizer conjugated silicon quantum dots-MnO<sub>2</sub> nanosystem for fluorescence imaging-guided efficient Photodynamic Therapy**

Ronggui Wang, Mengyao Zhao, Di Deng, Xin Ye , Fan Zhang, Hui  
Chen\*, Jilie Kong\*

Department of Chemistry, Fudan University, Shanghai 200433, China.

E-mail: [chenhui@fudan.edu.cn](mailto:chenhui@fudan.edu.cn); [jlkong@fudan.edu.cn](mailto:jlkong@fudan.edu.cn).

## Supplementary figures

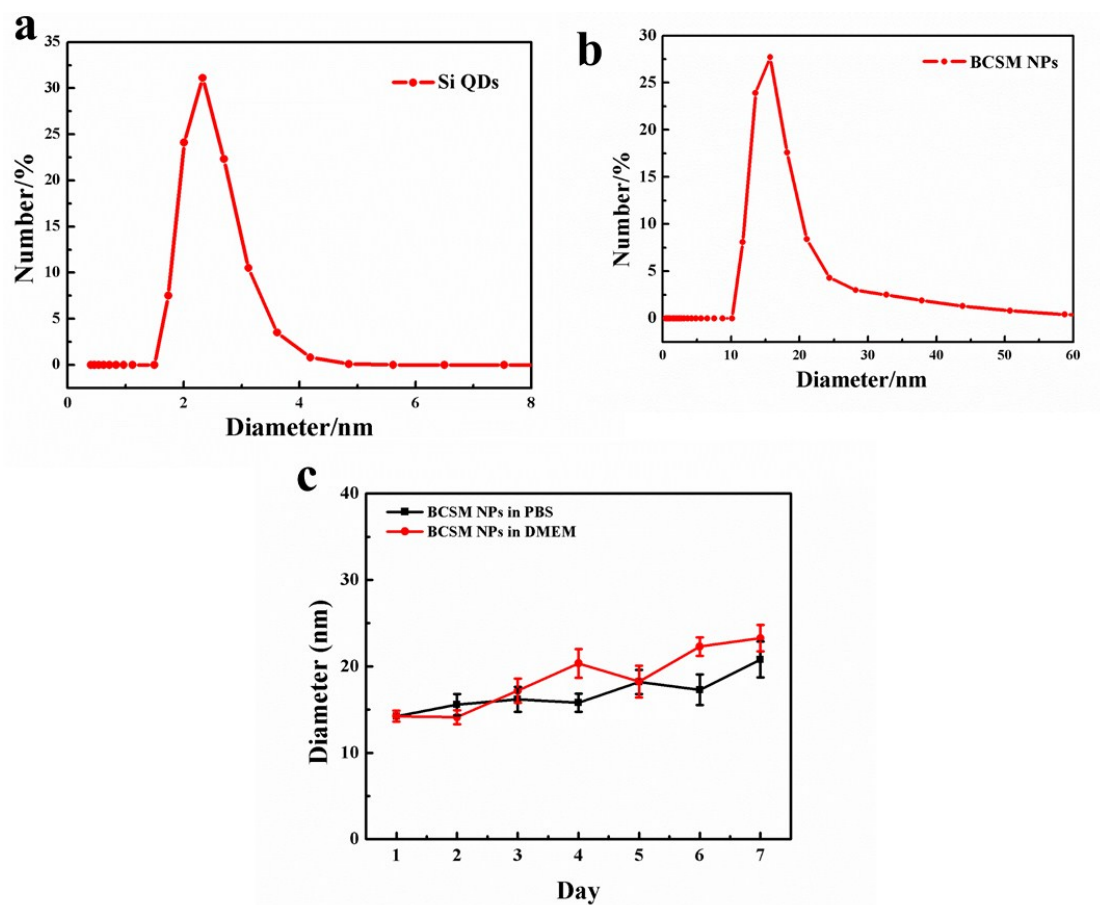

Fig. S1 Hydrodynamic diameters of Si QDs (a) and BCSM NPs detected by DLS. The hydrodynamic size changes of BCSM NPs in PBS and DMEM solutions in different solutions (PBS and DMEM) in a week (c).

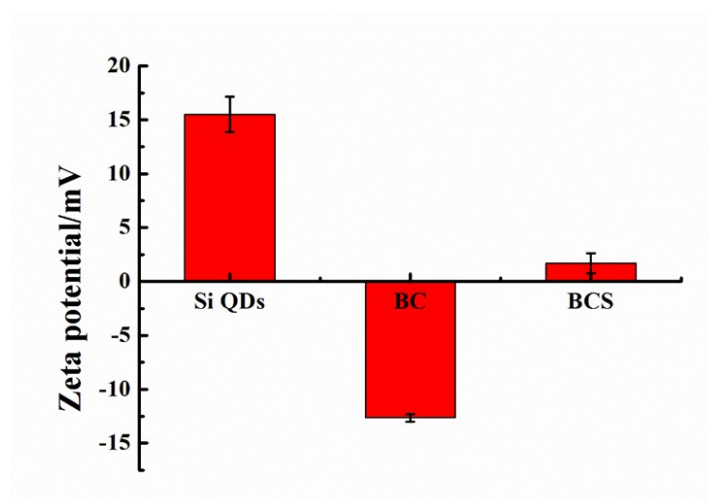

Fig. S2 Zeta potentials of Si QDs, BC and BCS NPs.

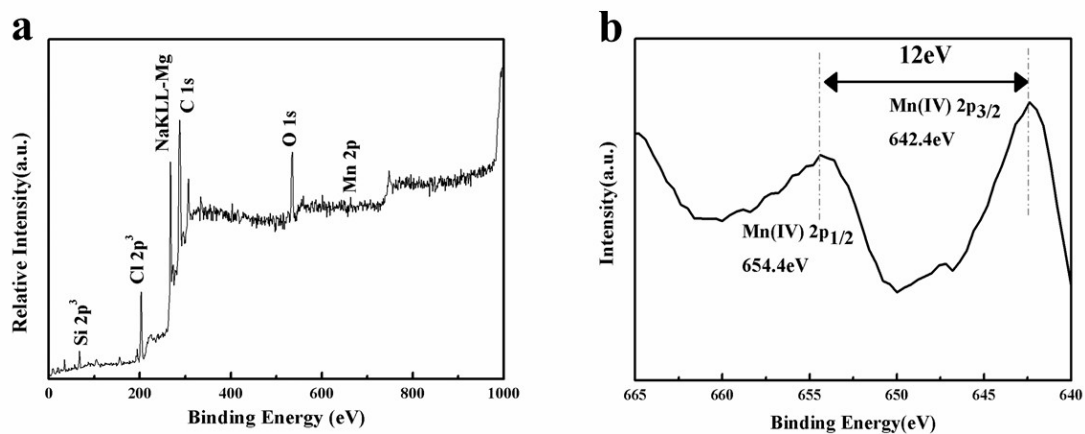

Fig.S3 High resolution X-ray photoelectron spectroscopy (XPS) spectrum of (a) full range, (b) Mn 2p of the BCSM NPs.

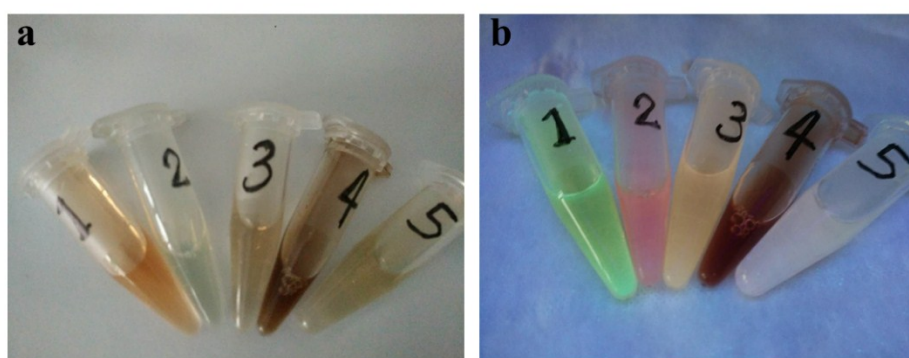

Fig. S4 Photos of Si QDs (1), BC (2), BCS (3), BCSM NPs (pH=7.4) (4) and BCSM NPs (pH=6.5) (5) solutions under visible light and UV light illumination (365 nm), respectively.

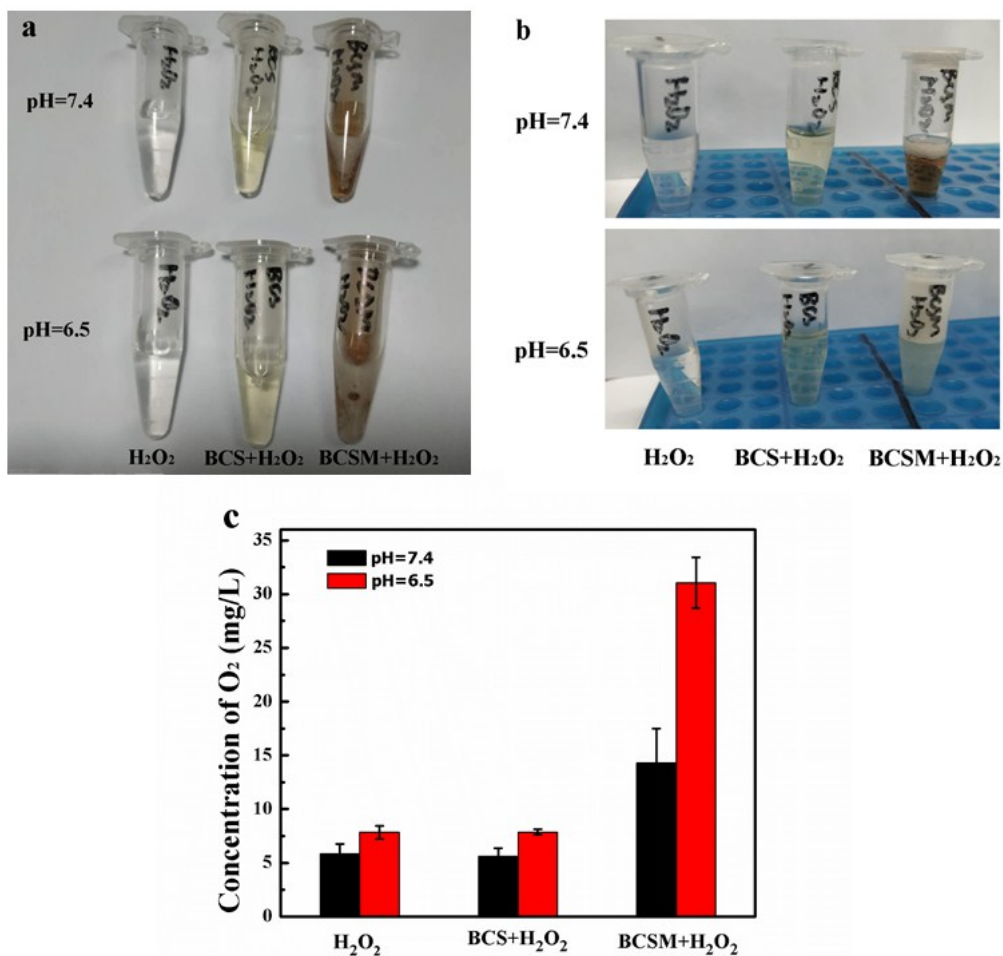

Fig. S5 Photos of BCSM NPs mixed with or without 50  $\mu$ L H<sub>2</sub>O<sub>2</sub> in the neutral or acid aqueous solutions at 0 h (a) and at 1 h (b). Oxygen generation in H<sub>2</sub>O<sub>2</sub> aqueous with BCSM NPs under different pH at 5 min (c).

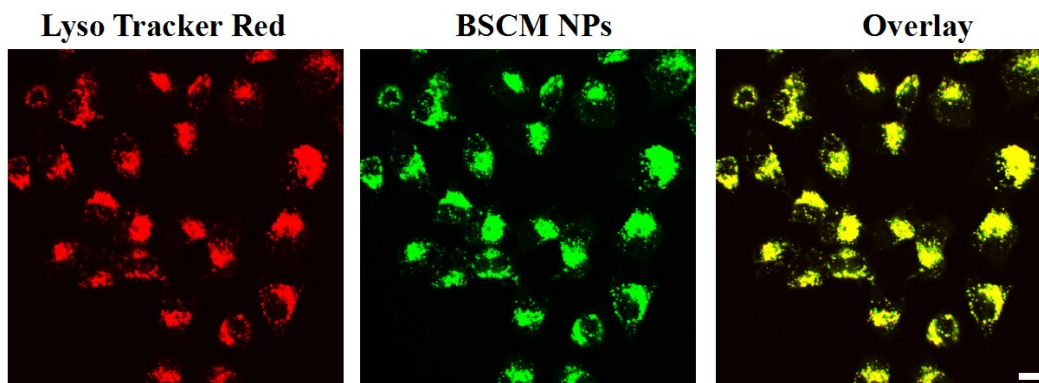

Fig. S6 LSCFM images of Hela cells incubated with BCSM NPs for 4 h then incubated with LysoTracker Red for 30 min. Red and green represent lysosome and BCSM NPs fluorescence at the excitement wavelength of 575 nm and 405 nm, respectively. Concentrations of Ce6, Si QDs, MnO<sub>2</sub> were 4.5  $\mu$ M, 100  $\mu$ g/mL and 2.8 mM. Scale bars: 20  $\mu$ m.

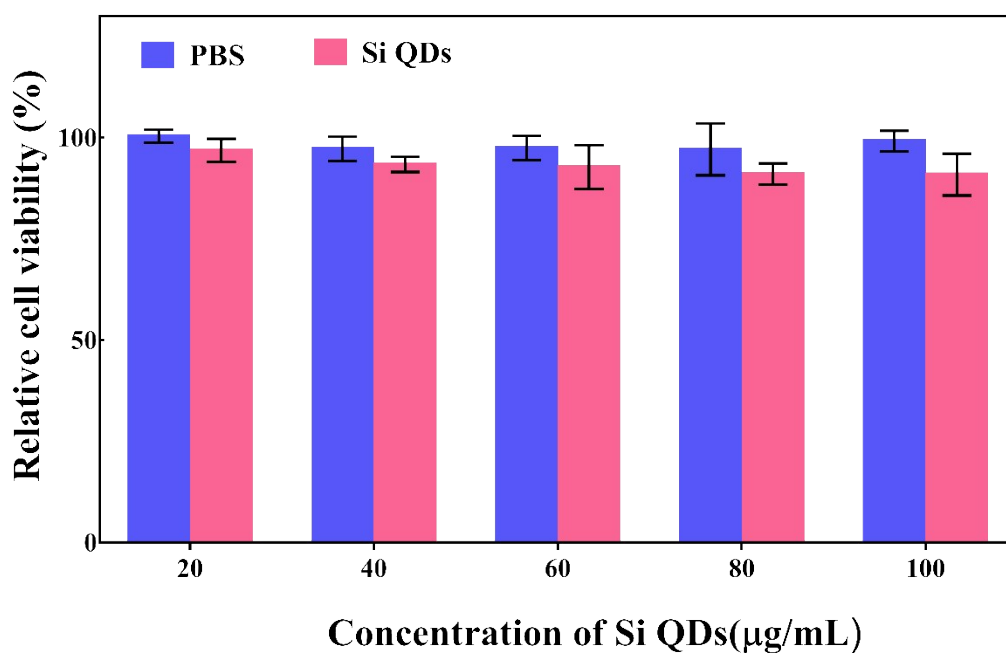

Fig. S7 Relative viabilities of Hela cells treated by different Si QDs under 638nm light exposure for 30 min (5 mW/cm<sup>2</sup>).

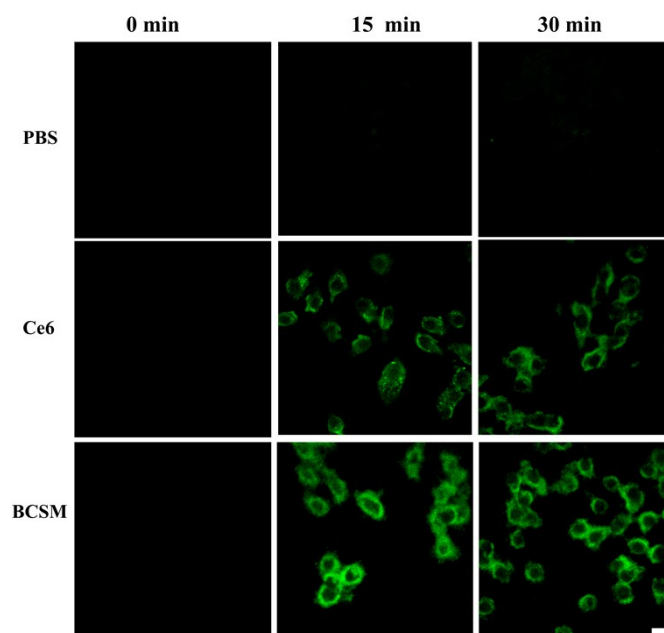

Fig. S8 LSCFM images of Hela cells for the Singlet oxygen (SO) detection using SO specific fluorescent probe DCFH-DA after 638 nm laser irradiation ( $5 \text{ mW/cm}^2$ ) for 0, 15, 30 min. The excitation wavelength is 488 nm. Scale bar:  $30 \text{ }\mu\text{m}$ .

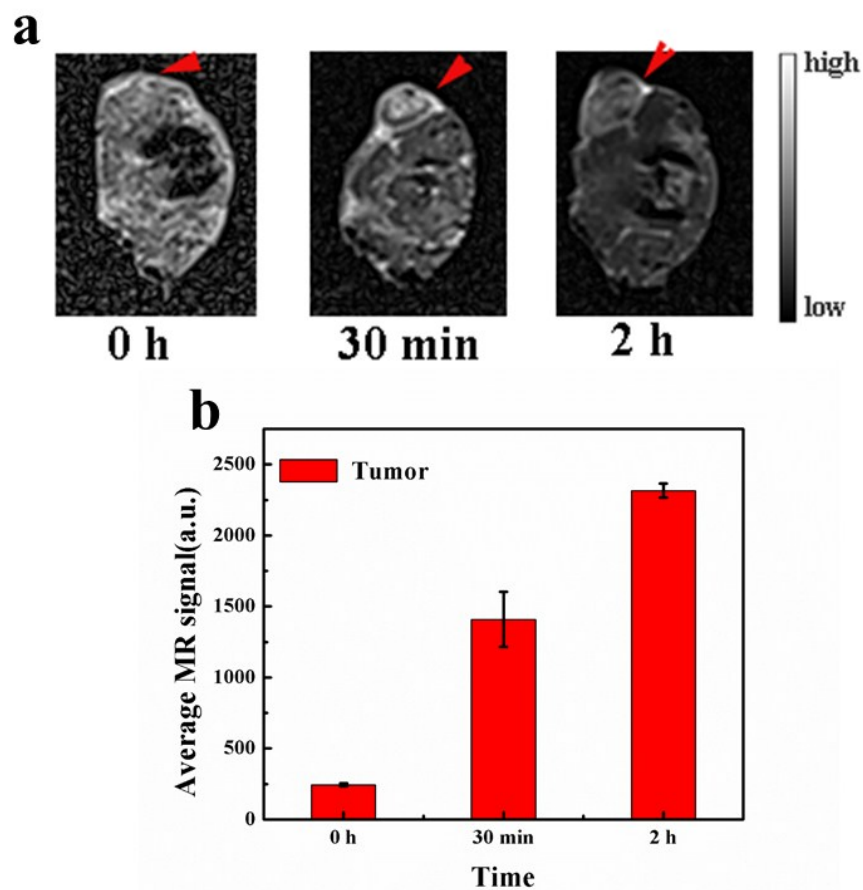

Fig. S9 a) T1-weighted MR images of Hela tumor-bearing mice before and after injection with 125  $\mu$ L BCSM NPs (concentrations of Ce6, Si QDs,  $\text{MnO}_2$  were 4.5 mM, 100 mg/mL and 2.8 mM respectively) for 30 min and 1 h. The semi-quantification MR intensities of tumor based on MRI images (Fig. S9 a).

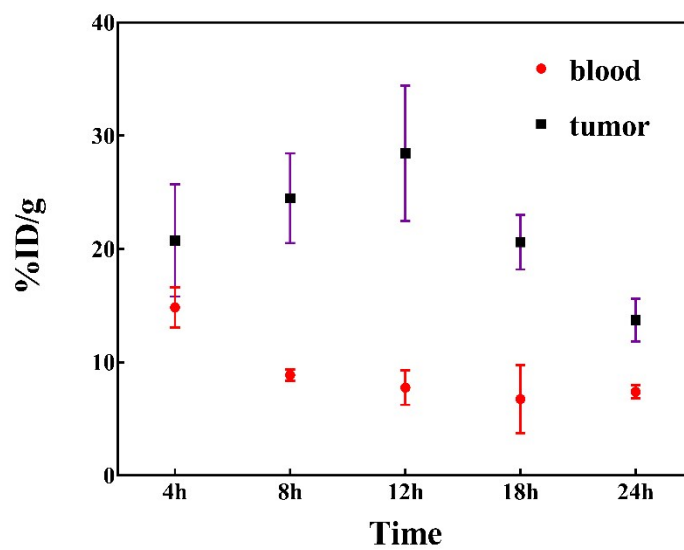

Fig. S10 Blood circulation curve of BCSM NPs in mice by measuring the concentration of Si in blood and tumor at different time points post injection. (%ID/g = percentage of the injected dose per gram of weight.)
